# Supplementary material
Source: publisher figshare collection journal article supplement (https://acs.figshare.com/ndownloader/files/4837018)
Supplement: Supplementary file 1 [file 4837018]

## SUPPORTING INFORMATION

### **Sclerotiamide: The First Non-Peptide-Based Natural Product Activator of Bacterial Caseinolytic Protease P**

Nathan P. Lavey,<sup>†,‡,§</sup> Jesse A. Coker,<sup>†,‡,§</sup> Eliza A. Ruben,<sup>§,⊥</sup> and Adam S. Duerfeldt<sup>\*,‡,§</sup>

<sup>‡</sup>*Institute for Natural Products Applications and Research Technologies and* <sup>§</sup>*Department of Chemistry & Biochemistry, Stephenson Life Sciences Research Center, University of Oklahoma, 101 Stephenson Parkway, Norman, Oklahoma 73019, United States*

<sup>⊥</sup>*Protein Production Core, University of Oklahoma COBRE in Structural Biology, Norman, OK, 73019, United States*

<sup>†</sup>Authors contributed equally

\*Corresponding author

#### TABLE OF CONTENTS

Structures of enopeptin A and ACP5  
B-score representation of Figure 2  
ACP5 SDS-PAGE for *BsClpP*  
ADEP1 degradation curves for *EcClpP*

Figure S1  
Figure S2  
Figure S3  
Figure S4

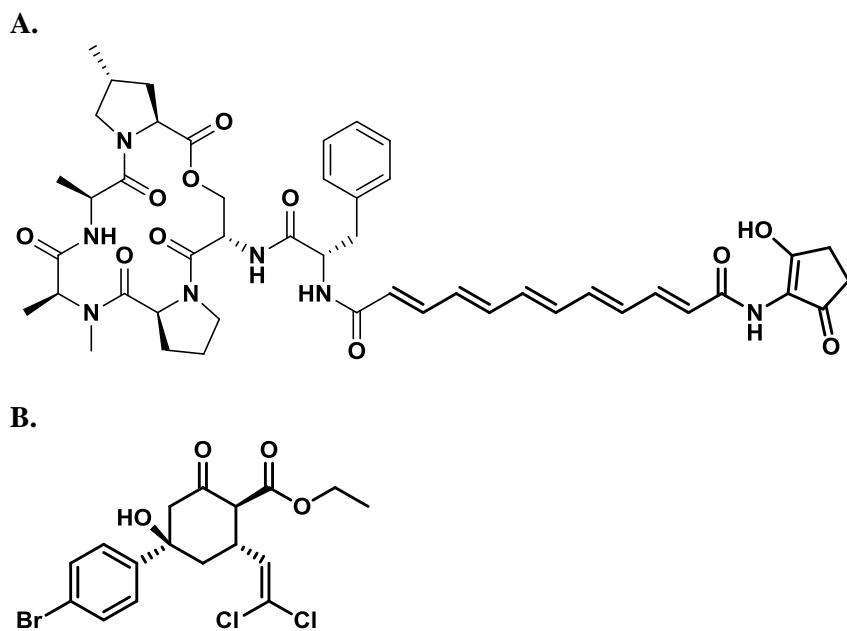

**Figure S1.** (A) Structure of enopeptin A. (B) Structure of ACP5

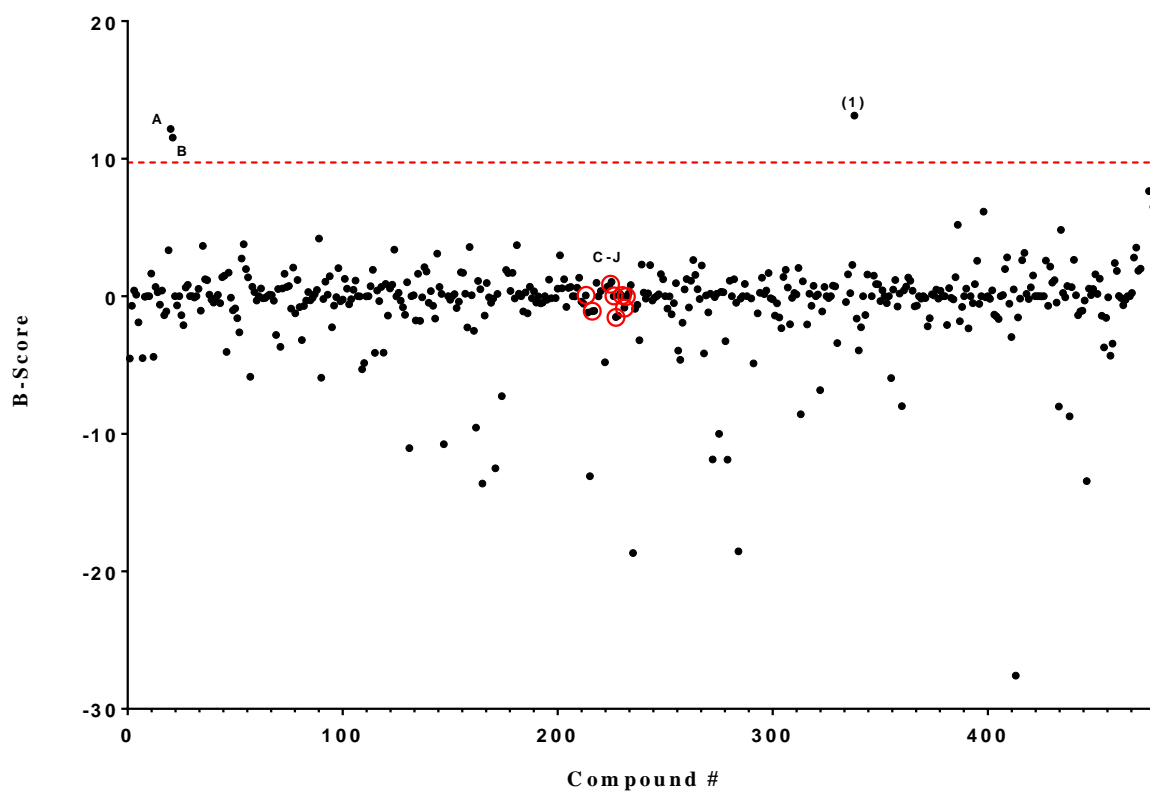

**Figure S2.** B-score representation of the initial natural product screen against *EcClpP*. Red-dashed line indicates three standard deviations from the mean general sample population. A = enopeptin A, B = ACP5, C-J = “hits” according to  $\Delta$ RFU data, (1) = sclerotiamide.

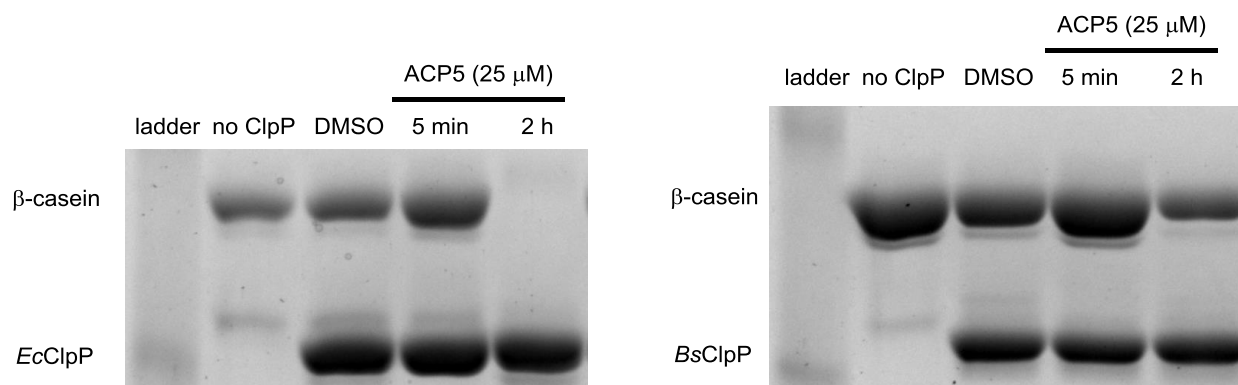

**Figure S3.** SDS-PAGE analysis of ClpP homologue dependent degradation of unlabeled  $\beta$ -casein by ACP5.

**A.**

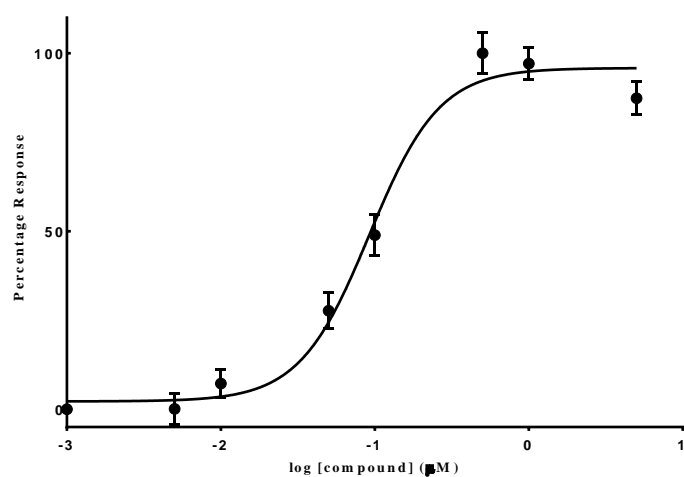

**B.**

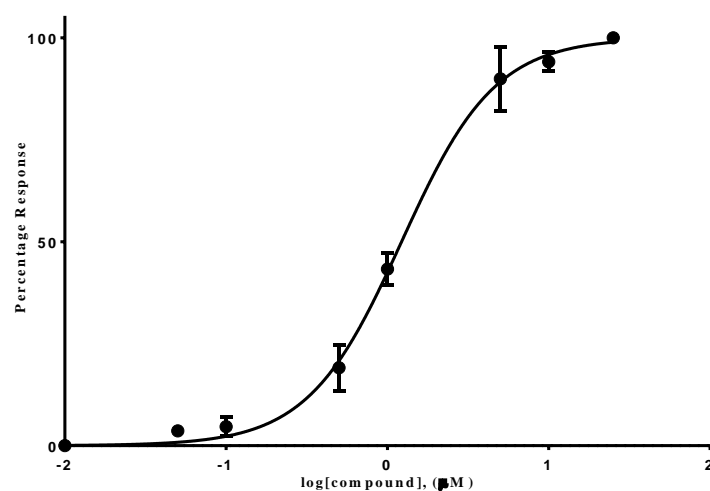

**Figure S4.** Dose dependent *EcClpP* activation by ADEP1. (A) substrate = Abz-DFAPKMALVPY<sup>NO2</sup> (B) substrate = FITC- $\beta$ -casein.
